# Supplementary material for: Organic–inorganic hybrid materials designed by controlled radical polymerization and mediated using commercial dual functional organophosphorous coupling agents
Source: Royal Society of Chemistry journal article supplement (doi:10.1039/c4nj01129e), 2014-09-16
Supplement: c4nj01129e1.pdf [file c4nj01129e1.pdf]

**Organic-inorganic hybrid materials designed by controlled radical polymerization and mediated with commercial dual functional organophosphorous coupling agents**

**Edgar Cao, Eric Prouzet\* and Valérie Héroguez\***

**Electronic Supplementary Information**

**Journal: New Journal of Chemistry**

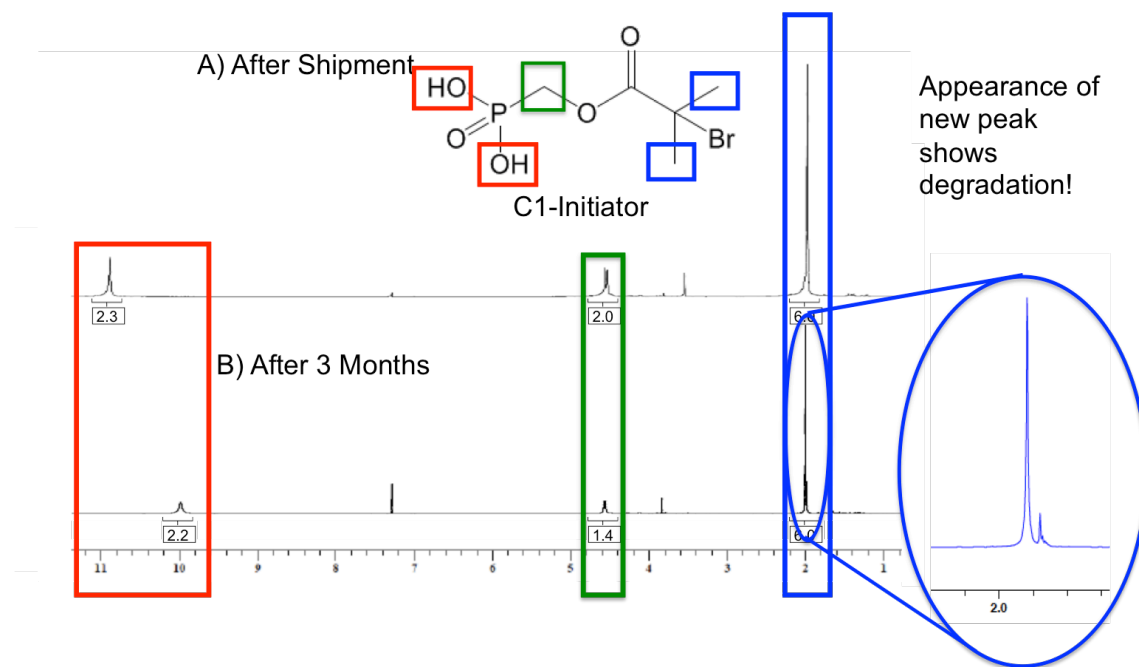

**Figure S1:  $^1\text{H}$  NMR for C1-Initiator in  $\text{CDCl}_3$  for A) provided from supplier upon receiving product and B) 3 months after the C1-Initiator was received. We observe the formation of a new peak, indicating that there is degradation of the C1-Initiator.**

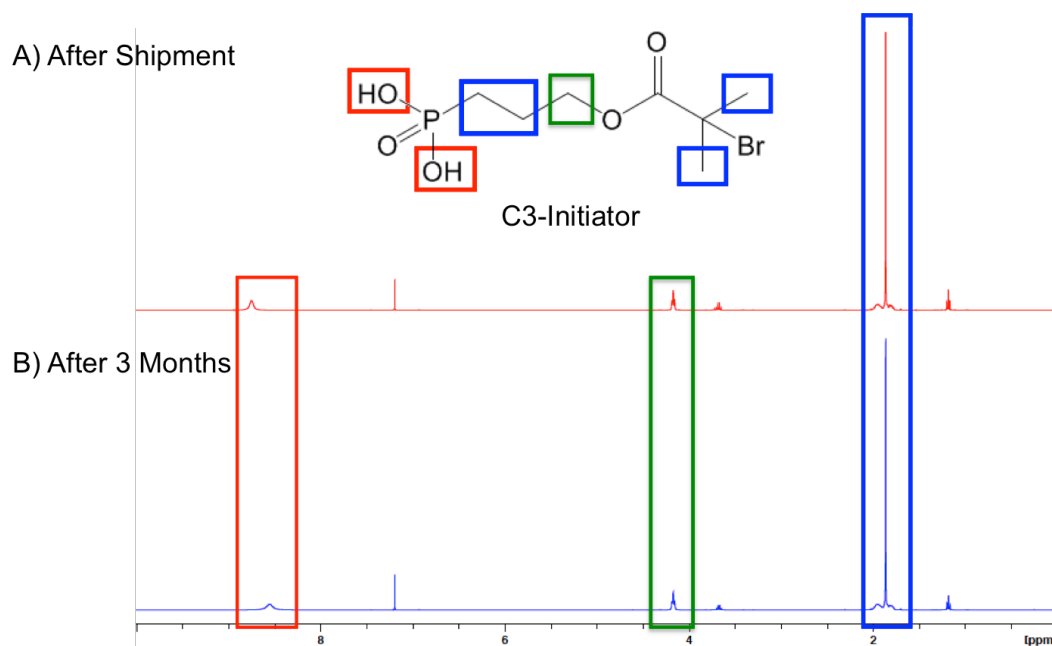

**Figure S2:  $^1\text{H}$  NMR for C3-Initiator made A) after receiving product and B) after 3 months of storage at  $4^\circ\text{C}$ . Notice that there does not appear to be any difference in the peaks over time (as compared to the C1-Initiator)**

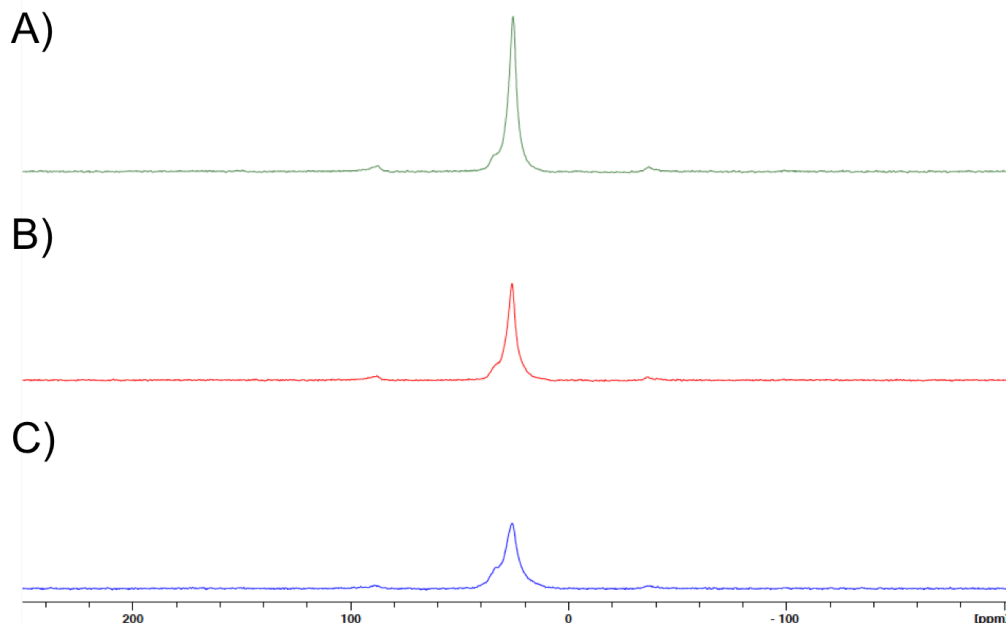

**Figure S3: P31 solid state NMR spectra for P21 (Sigma) particles bound to C3-Initiator molecules – A) performed at room temperature (20°C) for 2 hours, B) performed at 85°C for 2 hours and C) performed at 85°C for 2 hours, centrifuged and then heated at 155°C for 4 hours.**

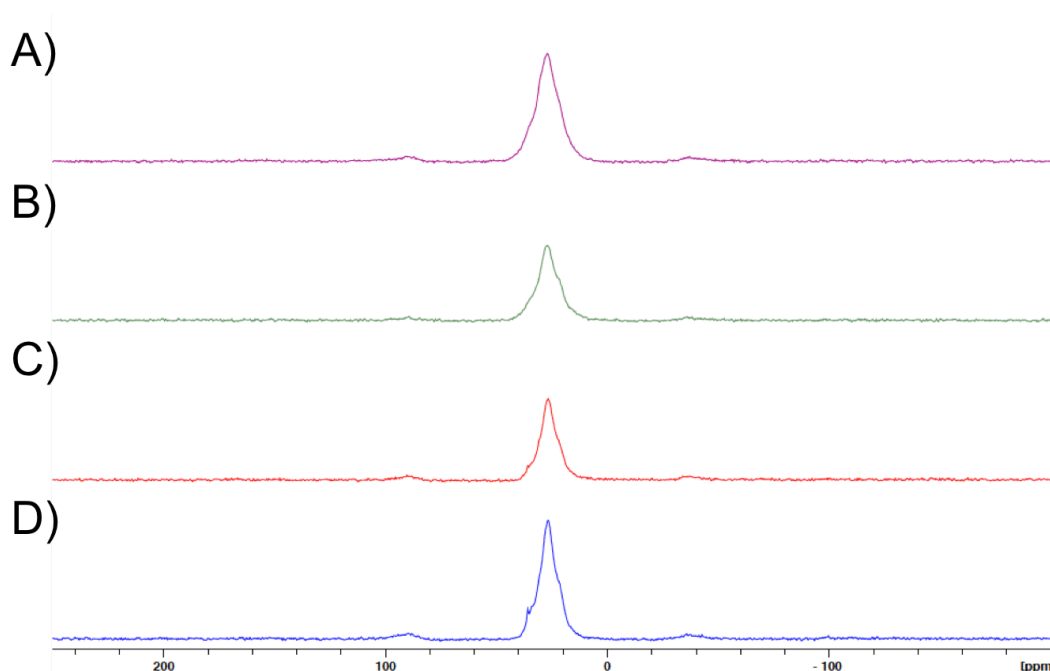

**Figure S4: P31 solid state NMR for E40 (Evonik) particles bound with C3-Initiator molecules – A) performed at room temperature (20°C) for 2 hours, B) performed at 85°C for 2 hours, C) performed at 85°C for 2 hours then centrifuged and heated at 155°C for 4 hours, and D) performed at 85°C for 2 hours then centrifuged and heated at 155°C for 4 hours then washed with DI water and dried.**

**Table S1: XPS results for P21 (Sigma), E40 (Evonik) and Flat Titania Support bound with C3-Initiator without exposure to UV-light**

| <b>Name</b> | <b>P21 + C3-Initiator</b> | <b>E40 + C3-Initiator</b> | <b>Flat Titania Surface + C3-Initiator</b> |
|-------------|---------------------------|---------------------------|--------------------------------------------|
| Al2p        | 1.2 %                     | 1.46 %                    | 1.56 %                                     |
| Si2p        |                           |                           | 0.7 %                                      |
| P2p         | 4.27 %                    | 4.06 %                    | 3.73 %                                     |
| Br3p3       | 0.42 %                    | 0.59 %                    | 0.22 %                                     |
| C1s         | 26.39 %                   | 26.95 %                   | 23.18 %                                    |
| N1s         | 0.39 %                    | 0.21 %                    | 0.25 %                                     |
| Ti2p        | 17.08 %                   | 16.9 %                    | 16.58 %                                    |
| O1s         | 50.07 %                   | 49.59 %                   | 52.34 %                                    |

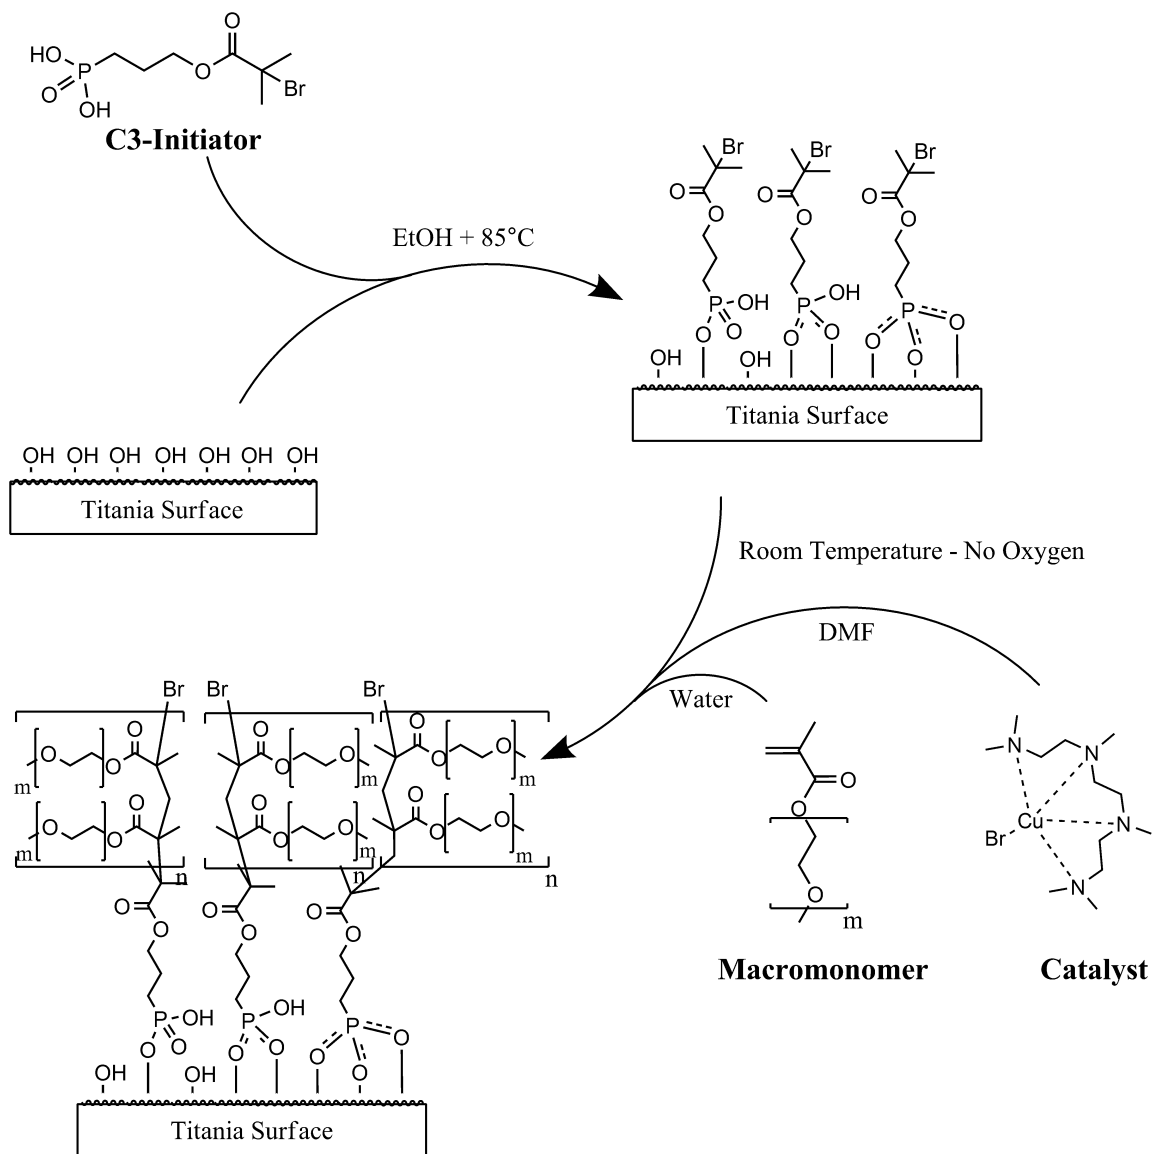

### Growing Polymer Film

**Figure S5: Master reaction schematic of the overall procedure from loading the C3-initiator onto the titania surface, to the resulting polymer film growth from the surface.**

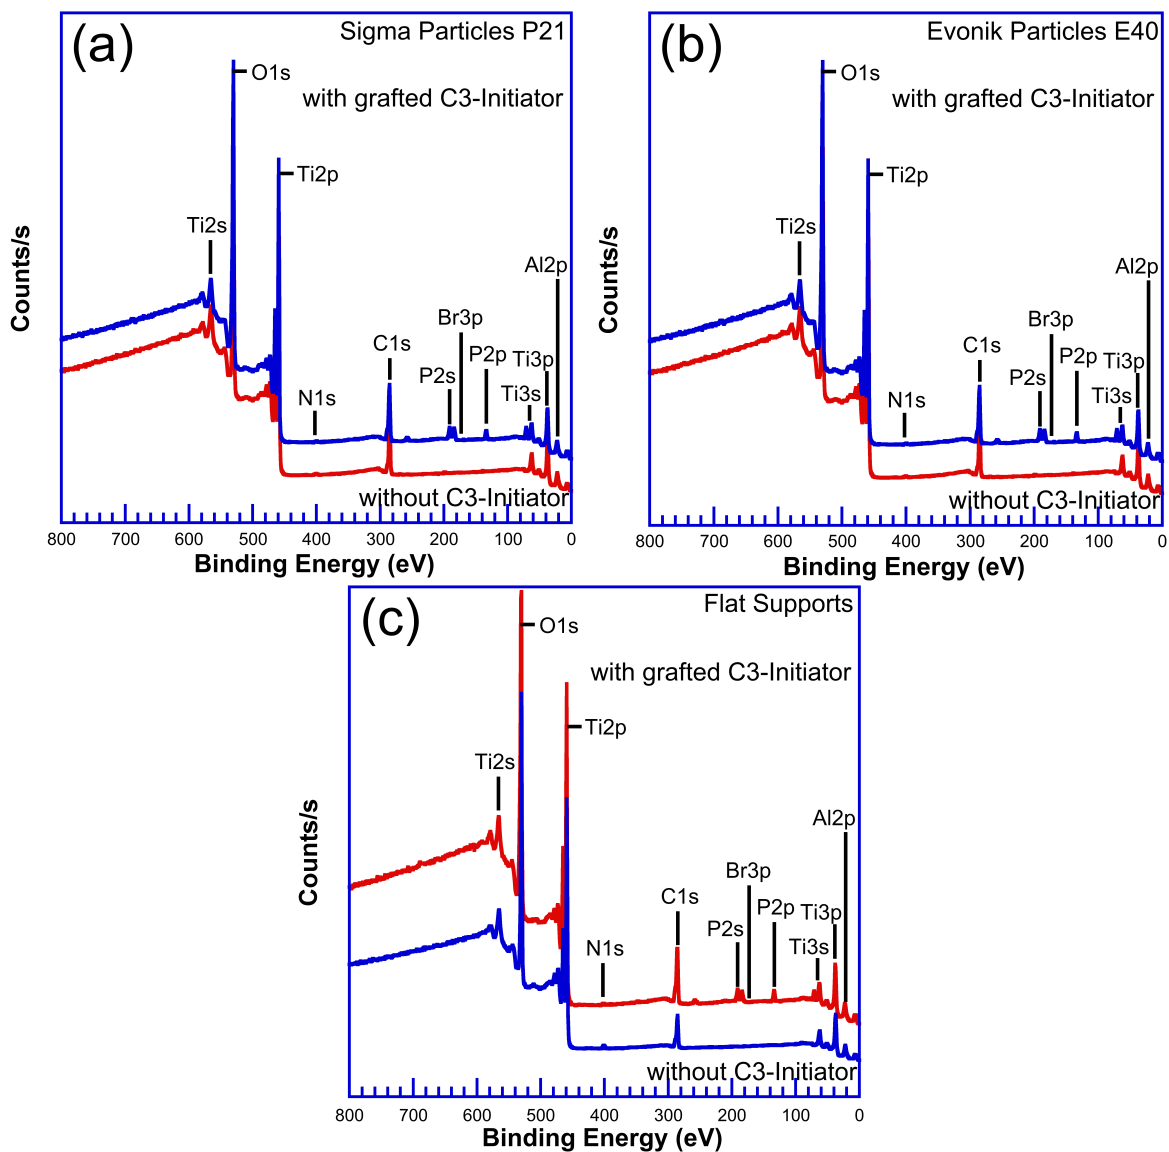

**Figure S6: Full XPS spectras for (a) Sigma P21 particles, (b) Evonik E40 particles, and (c) flat titania support.**
